# Supplementary material
Source: PubMed Central journal article supplement (PMC3790299)
Supplement: supp_M113.027599_mcp.M113.027599-2.pdf [file supp_M113.027599_mcp.M113.027599-2.pdf]

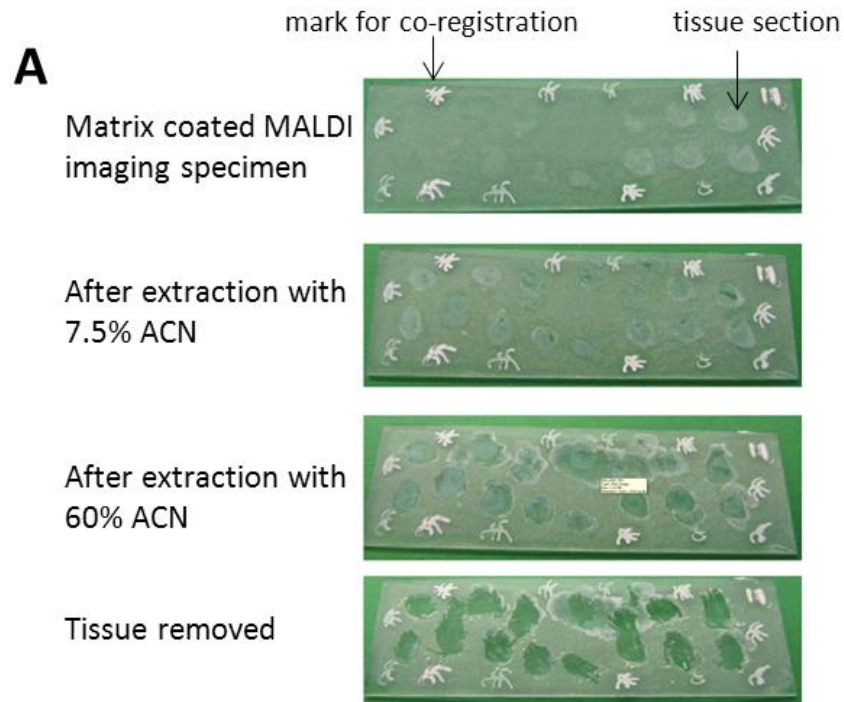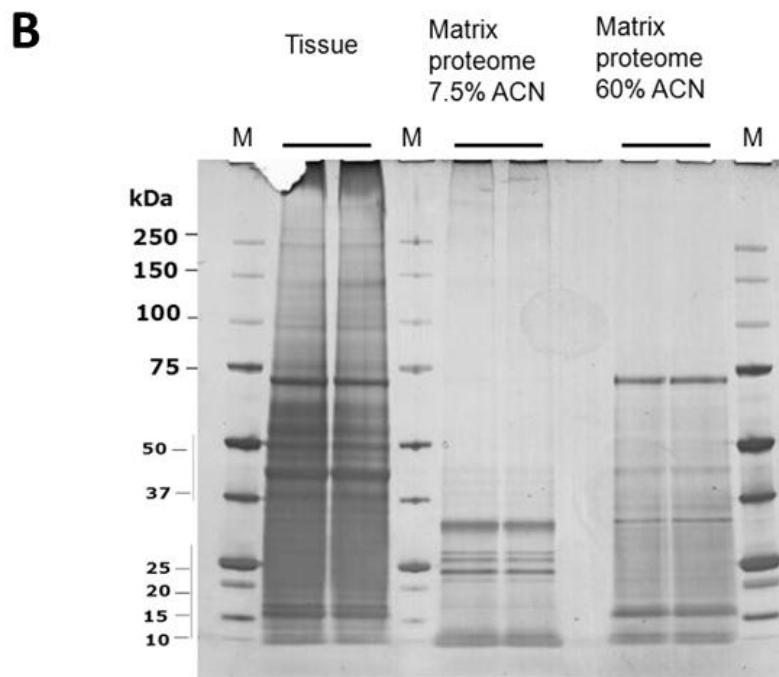

**Supplemental Figure 1:** A: MALDI imaging specimen (stomach normal tissue) during the different stages of the sample preparation process (compare Figure 1 in the main text). B: SDS PAGE of the 3 different extraction methods from A. (compare Figure 1 in the main text).
