# Supplementary material
Source: PubMed Central journal article supplement (PMC3790299)
Supplement: supp_M113.027599_mcp.M113.027599-3.pdf [file supp_M113.027599_mcp.M113.027599-3.pdf]

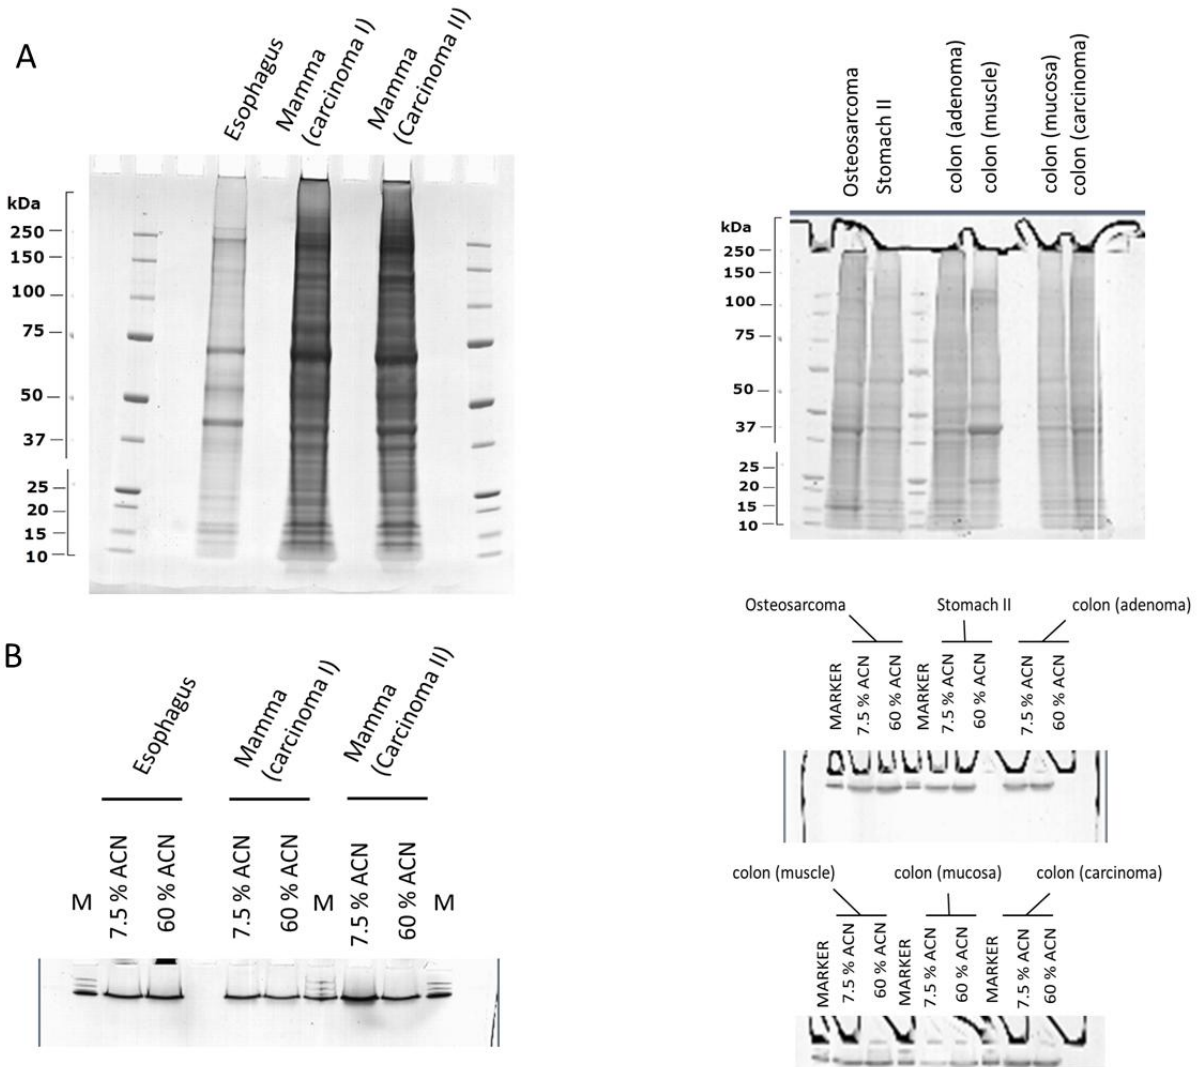

**Supplemental Figure 2: A:** SDS PAGE separation of proteins from tissues sections (compare Table A in Figure 2 in the main text) **B:** short time SDS PAGE separations of the 2 different matrix extraction procedures (compare Table A in Figure 2 in the main text)
