# Supplementary material
Source: PubMed Central journal article supplement (PMC3790299)

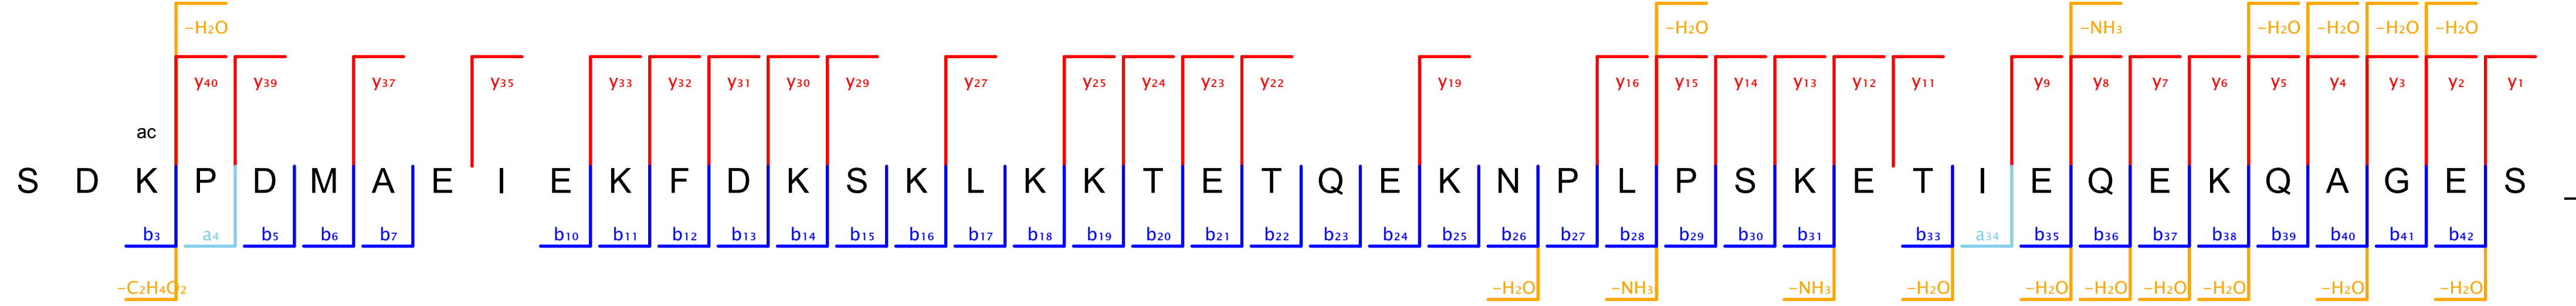

MS/MS spectrum of a 993.10653 m/z (+5) precursor identified with a mascot ion score of 267 as Thymosin beta-4

annotated using peaklist created by Mascot Distiller and the expert system available online from [www.biochem.mpg.de/mann/tools/](http://www.biochem.mpg.de/mann/tools/)

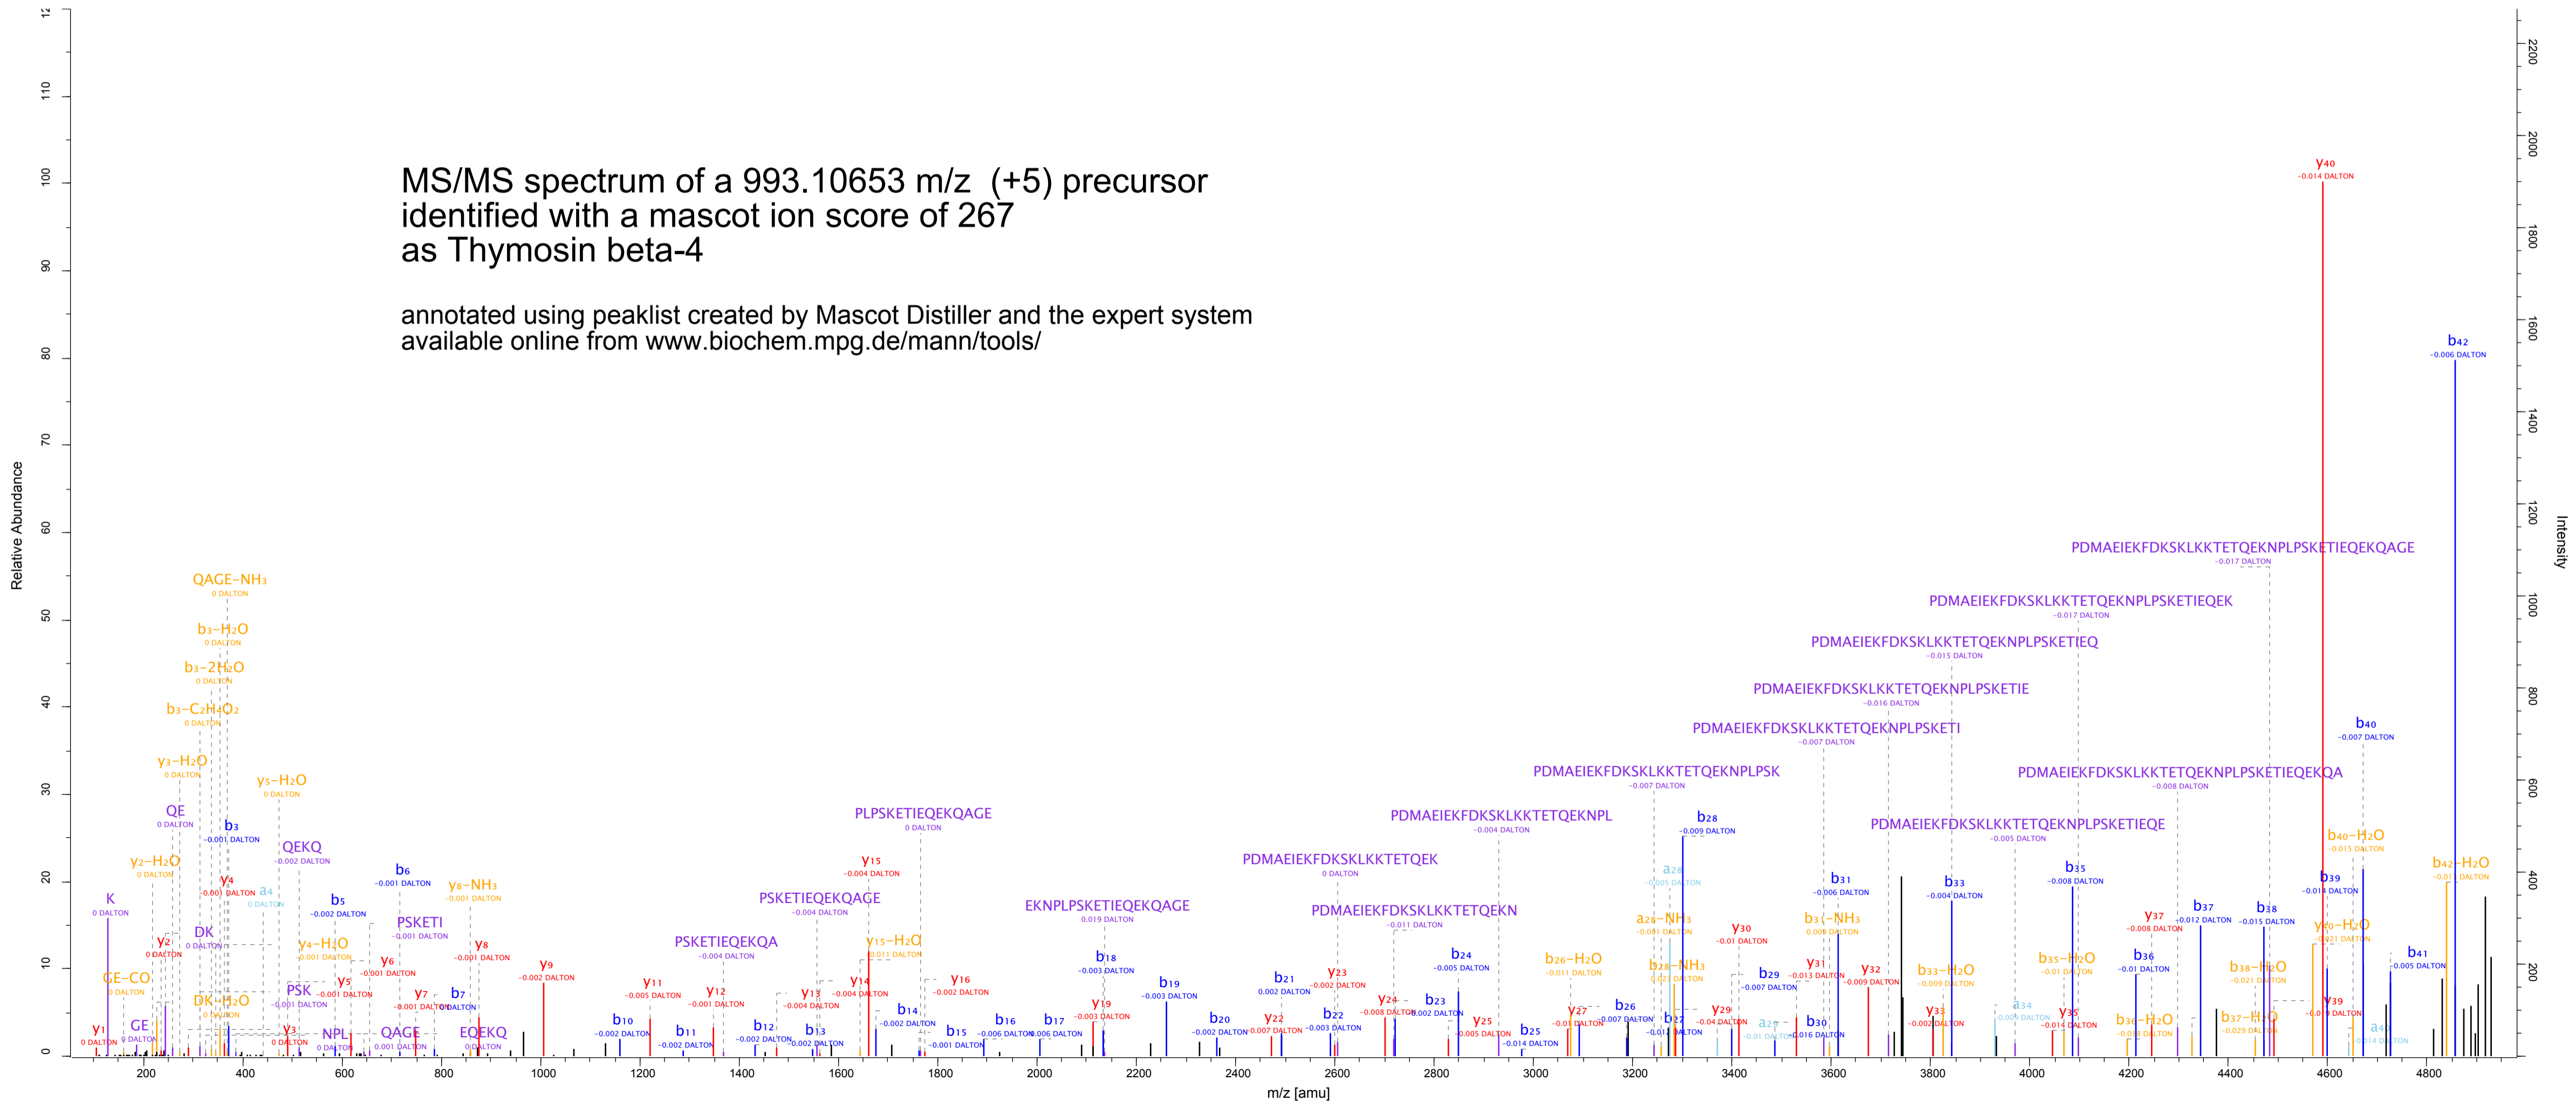

Supplement: supp_M113.027599_mcp.M113.027599-4.pdf [file supp_M113.027599_mcp.M113.027599-4.pdf]
