# Supplementary material
Source: PubMed Central journal article supplement (PMC3790299)
Supplement: supp_M113.027599_mcp.M113.027599-5.pdf [file supp_M113.027599_mcp.M113.027599-5.pdf]

a) number of identified peptides

IPI Human                      Subset DB

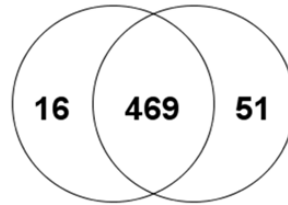

b) number of identified spectra

IPI Human                      Subset DB

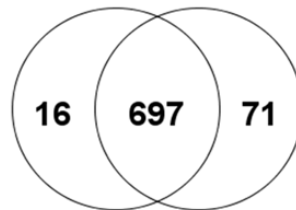

**Supplemental Figure 4:** Comparison of search results from top down identification of matrix extracts derived from MALDI imaging specimen of colon and esophagus tissue) using either the IPI human database or the bottom up derived fasta file on the peptide level (panel a) and on the spectrum level (panel b; see also Fig. 4b, main manuscript).
