# Supplementary material
Source: PubMed Central journal article supplement (PMC3790299)
Supplement: supp_M113.027599_mcp.M113.027599-10.pdf [file supp_M113.027599_mcp.M113.027599-10.pdf]

## Comprehensive identification of proteins from MALDI imaging

Maier et al.

### Supplemental Table 5:

List of 72 proteins identified in MALDI IMS studies in rodents (compare references below and Table 1 in main text)

| Protein name                                                                     | Accession UniProt | Frequency of observations |           |          | Reference     |
|----------------------------------------------------------------------------------|-------------------|---------------------------|-----------|----------|---------------|
|                                                                                  |                   | in extracts               | in tissue | combined |               |
| 10 kDa heat shock protein, mitochondrial                                         | P61604            | 20                        | 10        | 30       | 1, 4          |
| 40S ribosomal protein S21                                                        | P63220            | 15                        | 10        | 25       | 1             |
| 40S ribosomal protein S28                                                        | P62857            | 18                        | 10        | 28       | 1, 4          |
| 40S ribosomal protein S29                                                        | P62273            | 14                        | 8         | 22       | 1             |
| 60S acidic ribosomal protein P2                                                  | P05387            | 12                        | 10        | 22       | 1             |
| 60S ribosomal protein L38                                                        | P63173            | 18                        | 10        | 28       | 1             |
| Acyl-CoA-binding protein                                                         | P07108            | 15                        | 9         | 24       | 1, 2, 4, 7, 8 |
| Apolipoprotein A-II                                                              | P02652            | 5                         | 8         | 13       | 1             |
| ATP synthase, H <sup>+</sup> transporting, mitochondrial F1F0 complex, subunit e | P56385            | 14                        | 10        | 24       | 1             |
| ATP synthase-coupling factor 6, mitochondrial                                    | P18859            | 3                         | 4         | 7        | 1             |
| BASP1                                                                            | P80723            | 8                         | 2         | 10       | 5             |
| Beta-2-microglobulin                                                             | P61769            | 18                        | 9         | 27       | 1, 2          |
| Calgranulin A                                                                    | P05109            | 16                        | 9         | 25       | 8             |
| Calmodulin                                                                       | P62158            | 16                        | 9         | 25       | 2, 4, 5, 7, 8 |
| Copper transport protein ATOX1                                                   | O00244            | 0                         | 5         | 5        | 1             |
| COX 7a                                                                           | P24310            | 1                         | 4         | 5        | 5             |
| Cox6a                                                                            |                   | 10                        | 8         | 18       | 1             |
| Cystatin-B                                                                       | P04080            | 18                        | 10        | 28       | 1, 2          |
| Cystatin-C                                                                       | P01034            | 8                         | 5         | 13       | 4             |
| Cysteine-rich protein 1                                                          | P50238            | 13                        | 6         | 19       | 2             |
| Cysteine-rich secretory protein 1                                                | P54107            | 0                         | 0         | 0        | 2             |
| cytochrome b-c1 complex subunit 8                                                | O14949            | 5                         | 9         | 14       | 5             |
| cytochrome c oxidase polypeptides VIc-2                                          | P09669            | 18                        | 10        | 28       | 5             |
| Cytochrome c                                                                     | P99999            | 20                        | 10        | 30       | 1, 2, 7       |
| Cytochrome C oxidase                                                             | P00395            | 0                         | 2         | 2        | 4             |
| Cytochrome c oxidase copper chaperone                                            | Q14061            | 7                         | 1         | 8        | 1             |

|                                                       |        |    |    |    |               |
|-------------------------------------------------------|--------|----|----|----|---------------|
| Cytochrome c oxidase subunit 6B1                      | P14854 | 0  | 0  | 0  | 1, 7          |
| Cytochrome c oxidase subunit 7A2                      | Q49610 | 5  | 9  | 14 | 1, 2, 4, 7    |
| Cytochrome c oxidase subunit 7C,<br>mitochondrial     | P15954 | 4  | 8  | 12 | 2             |
| cytoplasmatic actin                                   | P60709 | 20 | 10 | 30 | 9             |
| Dynein light chain roadblock-type 1                   | Q9NP97 | 13 | 9  | 22 | 1             |
| E-cadherin binding protein E7                         | Q75N03 | 0  | 0  | 0  | 9             |
| Epididymal secretory glutathione<br>peroxidase        | O75715 | 0  | 0  | 0  | 2             |
| eptidyl-prolyl cis-trans isomerase<br>FKBP2           | P26885 | 12 | 9  | 21 | 2             |
| Galectin-1                                            | P09382 | 18 | 10 | 28 | 1             |
| Glutathione S-transferase Mu 1                        | P09488 | 0  | 3  | 3  | 2             |
| Glutathione S-transferase P 1                         | P09211 | 15 | 10 | 25 | 2             |
| H2A2A_MOUSE Histone H2A type 2-A                      | Q6FI13 | 20 | 10 | 30 | 1, 5          |
| Hemoglobin alpha                                      | P69905 | 20 | 10 | 30 | 1, 7, 8       |
| Hemoglobin subunit beta                               | P68871 | 20 | 10 | 30 | 1, 8          |
| Histone H2A type 1-C                                  | Q93077 | 12 | 9  | 21 | 4             |
| Histone H2B type 1                                    | P33778 | 18 | 9  | 27 | 4             |
| Histone H2B1                                          | Q93079 | 20 | 10 | 30 | 7             |
| Histone H3.1                                          | P68431 | 20 | 10 | 30 | 4, 5, 8       |
| Histone H4                                            | P62805 | 20 | 10 | 30 | 1, 4, 5, 7, 8 |
| Homeodomain-only protein                              | Q9BPY8 | 0  | 0  | 0  | 2             |
| Long-chain-fatty-acid--CoA ligase<br>ACSBG1           | Q96GR2 | 0  | 0  | 0  | 6             |
| Macrophage migration inhibitory<br>factor             | P14174 | 20 | 10 | 30 | 1, 2, 4       |
| Metallothionein-2/Metallothionein-1G                  | P13640 | 8  | 4  | 12 | 1             |
| Mitochondrial import receptor subunit<br>TOM7 homolog | Q9P0U1 | 0  | 0  | 0  | 1             |
| myelin basic protein                                  | P02686 | 0  | 0  | 0  | 5             |
| Myotrophin                                            | P58546 | 10 | 10 | 20 | 1             |
| neurogranin                                           | Q92686 | 0  | 0  | 0  | 5             |
| Peptidyl-prolyl cis-trans isomerase A                 | P62937 | 19 | 10 | 29 | 8             |
| Peptidyl-prolyl cis-trans isomerase<br>FKBP1A         | P62942 | 18 | 10 | 28 | 1, 2, 4       |
| Prostaglandin-H2 D-isomerase                          | P41222 | 0  | 0  | 0  | 2             |
| Protein S100-A10                                      | P60903 | 11 | 9  | 20 | 1             |
| Protein S100-A11                                      | P31949 | 20 | 10 | 30 | 1, 2, 8       |
| Protein S100-A6                                       | P06703 | 19 | 10 | 29 | 1             |
| Prothymosin alpha                                     | P06454 | 11 | 10 | 21 | 1, 2          |
| Purkinje cell protein 4                               | P48539 | 0  | 0  | 0  | 1             |
| S100A4                                                | P26447 | 17 | 10 | 27 | 9             |

|                                                      |        |    |    |    |                        |
|------------------------------------------------------|--------|----|----|----|------------------------|
| secretoneurin                                        | P13521 | 0  | 0  | 0  | 5                      |
| Serine protease inhibitor Kazal-type 3               | P00995 | 5  | 2  | 7  | 1                      |
| Serum albumin                                        | P02768 | 20 | 10 | 30 | 2, 3                   |
| Thioredoxin                                          | P10599 | 20 | 10 | 30 | 1, 2                   |
| Thymosin beta 10                                     | P63313 | 9  | 4  | 13 | 6, 7                   |
| Thymosin beta-4                                      | P62328 | 10 | 5  | 15 | 1, 2, 3, 4, 6, 7, 8, 9 |
| Transthyretin                                        | P02766 | 17 | 10 | 27 | 1, 2                   |
| Ubiquitin-40S ribosomal protein S27a                 | P62979 | 20 | 10 | 30 | 1, 2, 5, 8             |
| Ubiquitin-60S ribosomal protein L40                  | P62987 | 0  | 0  | 0  | 1                      |
| Up-regulated during skeletal muscle growth protein 5 | Q96IX5 | 7  | 10 | 17 | 5                      |

|                                        |    |        |        |
|----------------------------------------|----|--------|--------|
| total number of proteins in literature | 72 | 56     | 59     |
|                                        |    | 77.8 % | 81.9 % |

#### References

1. Burnum, K. E. *et al.* Imaging Mass Spectrometry Reveals Unique Protein Profiles During Embryo Implantation. *Endocrinology* **149**, 3274–3278 (2008).
2. Chaurand, P. *et al.* Profiling and imaging proteins in the mouse epididymis by imaging mass spectrometry. *Proteomics* **3**, 2221–2239 (2003).
3. Grüner, B. M. *et al.* MALDI Imaging Mass Spectrometry for In Situ Proteomic Analysis of Preneoplastic Lesions in Pancreatic Cancer. *PLoS ONE* **7**, e39424 (2012).
4. Hanrieder, J., Wicher, G., Bergquist, J., Andersson, M. & Fex-Svenningsen, A. MALDI mass spectrometry based molecular phenotyping of CNS glial cells for prediction in mammalian brain tissue. *Anal Bioanal Chem* **401**, 135–147 (2011).
5. Karlsson, O. *et al.* Neonatal exposure to the cyanobacterial toxin BMAA induces changes in protein expression, and neurodegeneration in adult hippocampus. *Toxicol. Sci.* (2012).doi:10.1093/toxsci/kfs241
6. Lagarrigue, M. *et al.* Revisiting rat spermatogenesis with MALDI imaging at 20-microm resolution. *Mol. Cell Proteomics* **10**, M110.005991 (2011).
7. Pierson, J. *et al.* Molecular profiling of experimental Parkinson's disease: direct analysis of peptides and proteins on brain tissue sections by MALDI mass spectrometry. *J. Proteome Res.* **3**, 289–295 (2004).
8. Reyzer, M. L. *et al.* Early Changes in Protein Expression Detected by Mass Spectrometry Predict Tumor Response to Molecular Therapeutics. *Cancer Res* **64**, 9093–9100 (2004).
9. Stoeckli, M., Chaurand, P., Hallahan, D. E. & Caprioli, R. M. Imaging mass spectrometry: a new technology for the analysis of protein expression in mammalian tissues. *Nat. Med.* **7**, 493–496 (2001).
