# Supplementary material
Source: PubMed Central journal article supplement (PMC3790299)
Supplement: supp_M113.027599_mcp.M113.027599-13.pdf [file supp_M113.027599_mcp.M113.027599-13.pdf]

## Comprehensive identification of proteins from MALDI imaging

Maier et al.

### Supplemental Table 8: Results for 'canonical pathway' analysis from IPA

Proteins identified in MALDI IMS studies from human tissues (compare Table 1)

| Ingenuity Canonical Pathways     | $-\log(p\text{-value})$ | Ratio    | number of molecules |
|----------------------------------|-------------------------|----------|---------------------|
| Mitochondrial Dysfunction        | 1.11E01                 | 8.03E-02 | 11                  |
| EIF2 Signaling                   | 3.12E00                 | 2.75E-02 | 5                   |
| Nur77 Signaling in T Lymphocytes | 2.9E00                  | 5.26E-02 | 3                   |
| Role of IL-17A in Psoriasis      | 2.89E00                 | 1.54E-01 | 2                   |
| Eumelanin Biosynthesis           | 1.78E00                 | 2.5E-01  | 1                   |

Proteins identified in MALDI IMS studies from rodent tissues (compare Supplemental Table 2)

| Ingenuity Canonical Pathways            | $-\log(p\text{-value})$ | Ratio    | number of molecules |
|-----------------------------------------|-------------------------|----------|---------------------|
| Mitochondrial Dysfunction               | 9.39E00                 | 7.3E-02  | 10                  |
| EIF2 Signaling                          | 4.94E00                 | 3.85E-02 | 7                   |
| mTOR Signaling                          | 2.88E00                 | 2.63E-02 | 5                   |
| LXR/RXR Activation                      | 2.68E00                 | 3.17E-02 | 4                   |
| Regulation of eIF4 and p70S6K Signaling | 2.42E00                 | 2.52E-02 | 4                   |

Matrix Extracts of the ten tissues Human (compare Supplemental Table 1)

| Ingenuity Canonical Pathways              | $-\log(p\text{-value})$ | Ratio    | number of molecules |
|-------------------------------------------|-------------------------|----------|---------------------|
| EIF2 Signaling                            | 3.43E01                 | 4.18E-01 | 76                  |
| Mitochondrial Dysfunction                 | 2.02E01                 | 3.8E-01  | 52                  |
| Regulation of Actin-based Motility by Rho | 1.06E01                 | 3.37E-01 | 29                  |
| Actin Cytoskeleton Signaling              | 1.03E01                 | 2.17E-01 | 50                  |
| Integrin Signaling                        | 8.9E00                  | 2.2E-01  | 45                  |
